# Supplementary material for: Description of a new and widely distributed species of Bathypathes (Cnidaria: Anthozoa: Antipatharia: Schizopathidae) previously misidentified as Bathypathes alternata Brook, 1889
Source: PeerJ. 2022 Feb 8;10:e12638. doi: 10.7717/peerj.12638 (PMC8833236; doi:10.7717/peerj.12638)
Supplement: Supplemental Information 1 — Only photographs of colonies that matched the external diagnostic features in overall colony morphology and branching pattern were included in the analysis. Catalogue numbers from the NOAA National Database of Deep-Sea Corals and Sponges (Database) or the NOAA Ocean Exploration Benthic Deepwater Animal Identification Guide (Guide). * collected [file peerj-10-12638-s001.xlsx]

## Sheet: photorecords examine
Supplementary Material S1. Bathypathes pseudoalternata sp. nov. photo records examined as part of this study
Only photographs of colonies that matched the external diagnostic features in overall colony morphology and branching pattern were included in the analysis. Catalogue numbers from the NOAA National Database of Deep-Sea Corals and Sponges (Database) or the NOAA Ocean Exploration Benthic Deepwater Animal Identification Guide (Guide). * collected
Source	Catalog No.	Locality	Latitude	Longitude	Depth	Vessel	Cruise	Date	Reference
					(m)		No.
		ATLANTIC OCEAN
Database	414396	De Soto Canyon, Gulf of Mexico	28.3002	-87.2874	2115	RV Falkor	FK004E	2012-09-02	Hourigan T (2020). NOAA Deep Sea Corals Research and Technology Program. Version 1.6. United States Geological Survey. Occurrence dataset https://doi.org/10.15468/aqbftj
Database	414442	Atwater Valley 357, Gulf of Mexico	27.5855	-89.7048	1058	RV Falkor	FK004E	2012-09-04	Hourigan T (2020). NOAA Deep Sea Corals Research and Technology Program. Version 1.6. United States Geological Survey. Occurrence dataset https://doi.org/10.15468/aqbftj
Database	414526	Okeanos Ridge, Gulf of Mexico	25.6761	-84.5977	591	RV Falkor	FK006C	2012-12-09	Hourigan T (2020). NOAA Deep Sea Corals Research and Technology Program. Version 1.6. United States Geological Survey. Occurrence dataset https://doi.org/10.15468/aqbftj
Database	419508	Northwestern Gulf of Mexico	26.4674	-84.778	452	RV Okeanos Explorer	EX1202L2	2012-03-20	Potter, J., Shank, T., Hsing, P. (2012). Oceanographic data and ROV dive-related multimedia and information collected during the EX1202L2 (Gulf of Mexico Exploration) expedition on NOAA Ship OKEANOS EXPLORER in the Gulf of Mexico from 2012-03-19 to 2012-04-11 (NCEI Accession 0087994). Umagery. NOAA National Centers for Environmental Information. Dataset. ttps://doi.org/10.25921/xh2m-3a08. Accesse…
Database	419594	Northwestern Gulf of Mexico	28.3003	-87.2873	2107	RV Okeanos Explorer	EX1202L2	2012-03-25	Potter, J., Shank, T., Hsing, P. (2012). Oceanographic data and ROV dive-related multimedia and information collected during the EX1202L2 (Gulf of Mexico Exploration) expedition on NOAA Ship OKEANOS EXPLORER in the Gulf of Mexico from 2012-03-19 to 2012-04-11 (NCEI Accession 0087994). Umagery. NOAA National Centers for Environmental Information. Dataset. ttps://doi.org/10.25921/xh2m-3a08. Accesse…
Database	914293	Okeanos Ridge, Gulf of Mexico	25.6704	-84.5843	522	RV Nancy Foster	NF-17-08	2017-08-20	Hourigan T (2020). NOAA Deep Sea Corals Research and Technology Program. Version 1.6. United States Geological Survey. Occurrence dataset https://doi.org/10.15468/aqbftj
Database	914571	North Wall, Gulf of Mexico	26.7806	-84.8712	584	RV Nancy Foster	NF-17-08	2017-08-22	Hourigan T (2020). NOAA Deep Sea Corals Research and Technology Program. Version 1.6. United States Geological Survey. Occurrence dataset https://doi.org/10.15468/aqbftj
Database	949094	South Reed, Gulf of Mexico	24.6566	-83.9079	647	RV Okeanos Explorer	EX1711	2017-11-30	Kennedy B, Messing C, Amon D (2019). Oceanographic data collected during the EX1711 Gulf of Mexico Mapping (ROV & Mapping) expedition on NOAA Ship OKEANOS EXPLORER in the Gulf of Mexico from 2017-11-29 to 2017-12-21 (NCEI Accession 0170751). Imagery. NOAA National Centers for Environmental Information. Dataset. https://doi.org/10.25921/qsmk-bj73. Accessed 13-09-2021.
Database	970392	De Soto Canyon, Gulf of Mexico	28.2841	-87.2242	2558	RV Okeanos Explorer	EX1803	2018-04-25	Pawlenko, Nikolai; Skarke, Adam; Wagner, Daniel (2019). Oceanographic data collected during the EX1803 Gulf of Mexico (ROV & Mapping) expedition on NOAA Ship OKEANOS EXPLORER in the Gulf of Mexico from 2018-04-11 to 2018-05-03 (NCEI Accession 0173643). [indicate subset used]. NOAA National Centers for Environmental Information. Dataset. https://doi.org/10.25921/kzqv-3g66. Accessed 13-09-2021
Database	971774	Florida Escarpment Canyon, Gulf of Mexico	24.5782	-84.2708	2365	RV Okeanos Explorer	EX1803	2018-05-01	Pawlenko, Nikolai; Skarke, Adam; Wagner, Daniel (2019). Oceanographic data collected during the EX1803 Gulf of Mexico (ROV & Mapping) expedition on NOAA Ship OKEANOS EXPLORER in the Gulf of Mexico from 2018-04-11 to 2018-05-03 (NCEI Accession 0173643). [indicate subset used]. NOAA National Centers for Environmental Information. Dataset. https://doi.org/10.25921/kzqv-3g66. Accessed 13-09-2021
Database	967918*	Blake Escarpment, Western Atlantic	30.9401	-77.3286	1321	RV Okeanos Explorer	EX1806	2018-06-17	Cantwell K, Morrison C, Sautter L (2019). Oceanographic data collected during the EX1806 Mid and Southeast US (ROV & Mapping) expedition on NOAA Ship OKEANOS EXPLORER in the North Atlantic Ocean from 2018-06-11 to 2018-07-02 (NCEI Accession 0177758). Imagery. NOAA National Centers for Environmental Information. Dataset. https://doi.org/10.25921/51yt-b051. Accessed 13-09-2021.
Database	967984	Blake Escarpment, Western Atlantic	30.94	-77.3295	1289	RV Okeanos Explorer	EX1806	2018-06-17	Cantwell K, Morrison C, Sautter L (2019). Oceanographic data collected during the EX1806 Mid and Southeast US (ROV & Mapping) expedition on NOAA Ship OKEANOS EXPLORER in the North Atlantic Ocean from 2018-06-11 to 2018-07-02 (NCEI Accession 0177758). Imagery. NOAA National Centers for Environmental Information. Dataset. https://doi.org/10.25921/51yt-b051. Accessed 13-09-2021.
Database	968069	Blake Escarpment, Western Atlantic	30.9402	-77.3299	1262	RV Okeanos Explorer	EX1806	2018-06-17	Cantwell K, Morrison C, Sautter L (2019). Oceanographic data collected during the EX1806 Mid and Southeast US (ROV & Mapping) expedition on NOAA Ship OKEANOS EXPLORER in the North Atlantic Ocean from 2018-06-11 to 2018-07-02 (NCEI Accession 0177758). Imagery. NOAA National Centers for Environmental Information. Dataset. https://doi.org/10.25921/51yt-b051. Accessed 13-09-2021.
Database	968401	Blake Escarpment, Western Atlantic	30.9413	-77.3301	1249	RV Okeanos Explorer	EX1806	2018-06-17	Cantwell K, Morrison C, Sautter L (2019). Oceanographic data collected during the EX1806 Mid and Southeast US (ROV & Mapping) expedition on NOAA Ship OKEANOS EXPLORER in the North Atlantic Ocean from 2018-06-11 to 2018-07-02 (NCEI Accession 0177758). Imagery. NOAA National Centers for Environmental Information. Dataset. https://doi.org/10.25921/51yt-b051. Accessed 13-09-2021.
Database	968557	Blake Plateau, Western Atlantic	29.3677	-79.7288	732	RV Okeanos Explorer	EX1806	2018-06-19	Cantwell K, Morrison C, Sautter L (2019). Oceanographic data collected during the EX1806 Mid and Southeast US (ROV & Mapping) expedition on NOAA Ship OKEANOS EXPLORER in the North Atlantic Ocean from 2018-06-11 to 2018-07-02 (NCEI Accession 0177758). Imagery. NOAA National Centers for Environmental Information. Dataset. https://doi.org/10.25921/51yt-b051. Accessed 13-09-2021.
Database	968733	Blake Plateau, Western Atlantic	29.3706	-79.7288	714	RV Okeanos Explorer	EX1806	2018-06-19	Cantwell K, Morrison C, Sautter L (2019). Oceanographic data collected during the EX1806 Mid and Southeast US (ROV & Mapping) expedition on NOAA Ship OKEANOS EXPLORER in the North Atlantic Ocean from 2018-06-11 to 2018-07-02 (NCEI Accession 0177758). Imagery. NOAA National Centers for Environmental Information. Dataset. https://doi.org/10.25921/51yt-b051. Accessed 13-09-2021.
Database	969472	Blake Plateau, Western Atlantic	32.0935	-77.1613	915	RV Okeanos Explorer	EX1806	2018-06-22	Cantwell K, Morrison C, Sautter L (2019). Oceanographic data collected during the EX1806 Mid and Southeast US (ROV & Mapping) expedition on NOAA Ship OKEANOS EXPLORER in the North Atlantic Ocean from 2018-06-11 to 2018-07-02 (NCEI Accession 0177758). Imagery. NOAA National Centers for Environmental Information. Dataset. https://doi.org/10.25921/51yt-b051. Accessed 13-09-2021.
Database	970524	Florida Escarpment, Gulf of Mexico	28.8254	-87.225	2388	RV Okeanos Explorer	EX1803	2018-04-25	Pawlenko, Nikolai; Skarke, Adam; Wagner, Daniel (2019). Oceanographic data collected during the EX1803 Gulf of Mexico (ROV & Mapping) expedition on NOAA Ship OKEANOS EXPLORER in the Gulf of Mexico from 2018-04-11 to 2018-05-03 (NCEI Accession 0173643). [indicate subset used]. NOAA National Centers for Environmental Information. Dataset. https://doi.org/10.25921/kzqv-3g66. Accessed 13-09-2021
Database	914426	Florida Escarpment, Gulf of Mexico	26.7718	-84.8659	530	RV Nancy Foster	NF-17-08	2017-08-22	Hourigan T (2020). NOAA Deep Sea Corals Research and Technology Program. Version 1.6. United States Geological Survey. Occurrence dataset https://doi.org/10.15468/aqbftj
Database	969362	Blake Plateau, Western Atlantic	32.09311	-77.1603	998	RV Okeanos Explorer	EX1806	2018-06-22	Cantwell K, Morrison C, Sautter L (2019). Oceanographic data collected during the EX1806 Mid and Southeast US (ROV & Mapping) expedition on NOAA Ship OKEANOS EXPLORER in the North Atlantic Ocean from 2018-06-11 to 2018-07-02 (NCEI Accession 0177758). Imagery. NOAA National Centers for Environmental Information. Dataset. https://doi.org/10.25921/51yt-b051. Accessed 13-09-2021.
Database	1069800*	Blake Plateau, Western Atlantic	29.586	-79.1223	770	RV Okeanos Explorer	EX1806	2019-11-02	Cantwell K, Morrison C, Sautter L (2019). Oceanographic data collected during the EX1806 Mid and Southeast US (ROV & Mapping) expedition on NOAA Ship OKEANOS EXPLORER in the North Atlantic Ocean from 2018-06-11 to 2018-07-02 (NCEI Accession 0177758). Imagery. NOAA National Centers for Environmental Information. Dataset. https://doi.org/10.25921/51yt-b051. Accessed 13-09-2021.
Database	1070368	Blake Plateau, Western Atlantic	29.5842	-79.1231	765	RV Okeanos Explorer	EX1907	2019-02-11	Galvez K, White M, Farrington S. (2019). Oceanographic data collected during the EX1907 Mid and Southeast US (ROV and Mapping) expedition on NOAA Ship OKEANOS EXPLORER in the North Atlantic Ocean from 2019-10-31 to 2019-11-21 (NCEI Accession 0207829). Imagery. NOAA National Centers for Environmental Information. Dataset. https://doi.org/10.25921/j30w-ac52. Accessed 13-09-2021
		PACIFIC OCEAN
Database	925975	Northern Manihiki Plateau	-4.58469	-162.39902	2213	RV Okeanos Explorer	EX1705	2017-02-05	Cantwell K, France S, Bohnenstiehl D. (2017). Oceanographic data and information collected during the EX1705 American Samoa, Kingman/Palmyra, Jarvis (ROV & Mapping) expedition on NOAA Ship OKEANOS EXPLORER in the Pacific Ocean from 2017-04-27 to 2017-05-19 (NCEI Accession 0163984). Imagery. NOAA National Centers for Environmental Information. Dataset. https://doi.org/10.7289/v5nv9ghj. Accessed 13…
Database	?920703	Titov Seamount	-0.3884	-176.20125	1718	RV Okeanos Explorer	EX1703	2019-11-12	Kennedy B,; Demopoulos A, Auscavitch S (2017). Oceanographic data and information collected during the EX1703 Howland/Baker PRIMNM and PIPA (ROV/Mapping) expedition on NOAA Ship OKEANOS EXPLORER in the South Pacific Ocean from 2017-03-07 to 2017-03-29 (NCEI Accession 0162616). Imagery. NOAA National Centers for Environmental Information. Dataset. https://doi.org/10.7289/v5sj1hw0. Accessed 13-09-2…
Database	1050313	Swains Island Ridge	-11.1145	-171.09044	2189	EV Nautilus	NA112	2019-07-24	Hourigan T (2020). NOAA Deep Sea Corals Research and Technology Program. Version 1.6. United States Geological Survey. Occurrence dataset https://doi.org/10.15468/aqbftj
Database	1050313	Swains Island Ridge	-11.1145	-171.09044	2189	EV Nautilus	NA112	2019-07-24	Hourigan T (2020). NOAA Deep Sea Corals Research and Technology Program. Version 1.6. United States Geological Survey. Occurrence dataset https://doi.org/10.15468/aqbftj
Database	536665	Kingman Reef	6.43462	-162.453	1312	RV Kaʻimikai-o-Kanaloa	N/A	2005-07-24	Hourigan T (2020). NOAA Deep Sea Corals Research and Technology Program. Version 1.6. United States Geological Survey. Occurrence dataset https://doi.org/10.15468/aqbftj
Database	1068798	Koko Seamount	35.5564	171.962	2123	RV Falkor	FK190726	2019-08-17	Hourigan T (2020). NOAA Deep Sea Corals Research and Technology Program. Version 1.6. United States Geological Survey. Occurrence dataset https://doi.org/10.15468/aqbftj
Database	883116	Alba Guyot	16.8577	154.061	2000	EV Okeanos Explorer	EX1606	2016-07-30	Kennedy B, Kelley C, Konter J (2019). Oceanographic data and ROV dive-related multimedia and information collected during the EX1606 (CAPSTONE Wake Island Unit PRIMNM (ROV & Mapping)) expedition on NOAA Ship OKEANOS EXPLORER in the North Pacific Ocean from 2016-07-27 to 2016-08-19 (NCEI Accession 0156560). Imagery. NOAA National Centers for Environmental Information. Dataset. https://doi.org/10.7…
Database	870873	Northwest Guam Seamount	14.0236	144.642	1312	EV Okeanos Explorer	EX1605L1	2016-04-28	Elliott K,; Amon D, Glickson D (2016). Oceanographic data and ROV dive-related multimedia and information collected during the EX1605L1 (CAPSTONE CNMI & Mariana Trench MNM (ROV & Mapping)) expedition on NOAA Ship OKEANOS EXPLORER in the North Pacific Ocean from 2016-04-20 to 2016-05-11 (NCEI Accession 0155916). Imagery. NOAA National Centers for Environmental Information. Dataset. https://doi.org…
Database	884759	Unnamed Guyor off Wake	19.4438	165.8	2052	EV Okeanos Explorer	EX0606	2016-08-06	Kennedy B, Kelley C, Konter J (2019). Oceanographic data and ROV dive-related multimedia and information collected during the EX1606 (CAPSTONE Wake Island Unit PRIMNM (ROV & Mapping)) expedition on NOAA Ship OKEANOS EXPLORER in the North Pacific Ocean from 2016-07-27 to 2016-08-19 (NCEI Accession 0156560). Imagery. NOAA National Centers for Environmental Information. Dataset. https://doi.org/10.7…
Database	932635	Unnamed Seamount off Johnston	14.057	-169.321	1508	EV Okeanos Explorer	EX1706	2017-07-27	Elliott K, Kelley C, Mah C. (2018). Oceanographic data and information collected during the EX1706 Johnston Atoll (ROV/Mapping) expedition on NOAA Ship OKEANOS EXPLORER in the Pacific Ocean from 2017-07-07 to 2017-08-02 (NCEI Accession 0165181). Imagery. NOAA National Centers for Environmental Information. Dataset. https://doi.org/10.25921/wax2-kk29. Accessed 13-09-2021.
Database	925975	Northern Manihiki Plateau	-4.58469	-166.984	2213	EV Okeanos Explorer	EX1705	2017-05-02	Cantwell K, France S, Bohnenstiehl D. (2017). Oceanographic data and information collected during the EX1705 American Samoa, Kingman/Palmyra, Jarvis (ROV & Mapping) expedition on NOAA Ship OKEANOS EXPLORER in the Pacific Ocean from 2017-04-27 to 2017-05-19 (NCEI Accession 0163984). Imagery. NOAA National Centers for Environmental Information. Dataset. https://doi.org/10.7289/v5nv9ghj. Accessed 13…
Guide	D2-EX1504-L2-08-21:34:15	Bank 9, Northwestern Hawaiian Islands	26.8228	-175.607	1339	RV Okeanos Explorer	EX1504-L2	2015-08-09	Elliott K, Kelley C, Wagner D. (2015). Oceanographic data and ROV dive-related multimedia and information collected during the EX1504L2 (CAPSTONE: NWHI Exploration Leg II) expedition on NOAA Ship OKEANOS EXPLORER in the North Pacific Ocean from 2015-07-31 to 2015-08-22 (NCEI Accession 0131885). Imagery. NOAA National Centers for Environmental Information. Dataset. https://doi.org/10.7289/v54t6gcm…
Guide	D2-EX1504-L2-08-21:37:13	Bank 9, Northwestern Hawaiian Islands	26.8229	-175.607	1340	RV Okeanos Explorer	EX1504-L2	2015-08-09	Elliott K, Kelley C, Wagner D. (2015). Oceanographic data and ROV dive-related multimedia and information collected during the EX1504L2 (CAPSTONE: NWHI Exploration Leg II) expedition on NOAA Ship OKEANOS EXPLORER in the North Pacific Ocean from 2015-07-31 to 2015-08-22 (NCEI Accession 0131885). Imagery. NOAA National Centers for Environmental Information. Dataset. https://doi.org/10.7289/v54t6gcm…
Guide	D2-EX1504-L3-04-23:26:08	McCall Seamount	18.9787	-157.11	2650	RV Okeanos Explorer	EX1504-L3	2015-08-31	Kennedy B, Kelley C, Parrish F (2019). Oceanographic data and ROV dive-related multimedia and information collected during the EX1504L3 (CAPSTONE Leg III: Main Hawaiian Islands and Geologists Seamounts (ROV/Mapping)) expedition on NOAA Ship OKEANOS EXPLORER in the North Pacific Ocean from 2015-08-28 to 2015-09-03 (NCEI Accession 0131886). Imagery. NOAA National Centers for Environmental Informati…
Guide	D2-EX1605-L3-15-00:14:22	Explorer Ridge, Marianas Trench Marine National Monument	20.7243	145.062	1804	RV Okeanos Explorer	EX1605-L3	2016-07-02	Cantwell K, Pomponi S, Fryer P (2019). Oceanographic data and information collected during the EX1605L3 (CAPSTONE CNMI & Mariana Trench MNM (ROV & Mapping)) expedition on NOAA Ship OKEANOS EXPLORER in the North Pacific Ocean from 2016-06-17 to 2016-07-10 (NCEI Accession 0156334). Imagery. NOAA National Centers for Environmental Information. Dataset. https://doi.org/10.7289/v5c24tgx. Accessed 13-0…
Guide	D2-EX1606-06-04:46:15	Unnanmed Guyot, Wake Atoll	19.4438	165.8	2052	RV Okeanos Explorer	EX1606	2016-08-06	Kennedy B, Kelley C, Konter J (2019). Oceanographic data and ROV dive-related multimedia and information collected during the EX1606 (CAPSTONE Wake Island Unit PRIMNM (ROV & Mapping)) expedition on NOAA Ship OKEANOS EXPLORER in the North Pacific Ocean from 2016-07-27 to 2016-08-19 (NCEI Accession 0156560). Imagery. NOAA National Centers for Environmental Information. Dataset. https://doi.org/10.7…
Guide	D2-EX1703-18-22:51:45	Unnamed seamount, Phoenix Islands Protected Area	-6.49152	-173.582	1923	RV Okeanos Explorer	EX1703	2017-03-25	Kennedy, Brian; Demopoulos, Amanda; Auscavitch, Steven (2017). Oceanographic data and information collected during the EX1703 Howland/Baker PRIMNM and PIPA (ROV/Mapping) expedition on NOAA Ship OKEANOS EXPLORER in the South Pacific Ocean from 2017-03-07 to 2017-03-29 (NCEI Accession 0162616). [indicate subset used]. NOAA National Centers for Environmental Information. Dataset. https://doi.org/10.…
Guide	D2-EX1705-09-20:58:27	West Palmyra Seamount	5.8528	-162.51	2171	RV Okeanos Explorer	EX1705	2017-05-10	Cantwell K, France S, Bohnenstiehl D. (2017). Oceanographic data and information collected during the EX1705 American Samoa, Kingman/Palmyra, Jarvis (ROV & Mapping) expedition on NOAA Ship OKEANOS EXPLORER in the Pacific Ocean from 2017-04-27 to 2017-05-19 (NCEI Accession 0163984). Imagery. NOAA National Centers for Environmental Information. Dataset. https://doi.org/10.7289/v5nv9ghj. Accessed 13…
Guide	D2-EX1705-12-20:56:10	Kingman Deep	6.41674	-162.215	2254	RV Okeanos Explorer	EX1705	2017-05-13	Cantwell K, France S, Bohnenstiehl D. (2017). Oceanographic data and information collected during the EX1705 American Samoa, Kingman/Palmyra, Jarvis (ROV & Mapping) expedition on NOAA Ship OKEANOS EXPLORER in the Pacific Ocean from 2017-04-27 to 2017-05-19 (NCEI Accession 0163984). Imagery. NOAA National Centers for Environmental Information. Dataset. https://doi.org/10.7289/v5nv9ghj. Accessed 13…
Guide	D2-EX1706-02-23:53:51	Johnston Atoll	19.5521	-168.377	1911	RV Okeanos Explorer	EX1706	2017-07-13	Elliott K, Kelley C, Mah C. (2018). Oceanographic data and information collected during the EX1706 Johnston Atoll (ROV/Mapping) expedition on NOAA Ship OKEANOS EXPLORER in the Pacific Ocean from 2017-07-07 to 2017-08-02 (NCEI Accession 0165181). Imagery. NOAA National Centers for Environmental Information. Dataset. https://doi.org/10.25921/wax2-kk29. Accessed 13-09-2021.
Guide	D2-EX1706-05-20:41:29	Johnston Atoll	16.1981	-169.562	2175	RV Okeanos Explorer	EX1706	2017-07-17	Elliott K, Kelley C, Mah C. (2018). Oceanographic data and information collected during the EX1706 Johnston Atoll (ROV/Mapping) expedition on NOAA Ship OKEANOS EXPLORER in the Pacific Ocean from 2017-07-07 to 2017-08-02 (NCEI Accession 0165181). Imagery. NOAA National Centers for Environmental Information. Dataset. https://doi.org/10.25921/wax2-kk29. Accessed 13-09-2021.
Guide	D2-EX1706-08-21:49:56	Pierpoint Seamount, Johnston Atoll	15.4701	-171.99	1579	RV Okeanos Explorer	EX1706	2017-07-22	Elliott K, Kelley C, Mah C. (2018). Oceanographic data and information collected during the EX1706 Johnston Atoll (ROV/Mapping) expedition on NOAA Ship OKEANOS EXPLORER in the Pacific Ocean from 2017-07-07 to 2017-08-02 (NCEI Accession 0165181). Imagery. NOAA National Centers for Environmental Information. Dataset. https://doi.org/10.25921/wax2-kk29. Accessed 13-09-2021.
Guide	D2-EX1706-12:22-51:07	Sleepy Hollow Seamount, Johnston Atoll	14.5351	-169.922	2254	RV Okeanos Explorer	EX1706	2017-07-26	Elliott K, Kelley C, Mah C. (2018). Oceanographic data and information collected during the EX1706 Johnston Atoll (ROV/Mapping) expedition on NOAA Ship OKEANOS EXPLORER in the Pacific Ocean from 2017-07-07 to 2017-08-02 (NCEI Accession 0165181). Imagery. NOAA National Centers for Environmental Information. Dataset. https://doi.org/10.25921/wax2-kk29. Accessed 13-09-2021.
Guide	D2-EX1706-15-21:01:56	Johnston Atoll	15.1598	-167.036	1983	RV Okeanos Explorer	EX1706	2017-07-29	Elliott K, Kelley C, Mah C. (2018). Oceanographic data and information collected during the EX1706 Johnston Atoll (ROV/Mapping) expedition on NOAA Ship OKEANOS EXPLORER in the Pacific Ocean from 2017-07-07 to 2017-08-02 (NCEI Accession 0165181). Imagery. NOAA National Centers for Environmental Information. Dataset. https://doi.org/10.25921/wax2-kk29. Accessed 13-09-2021.
Guide	D2-EX1708-03-20:23:20	Beethoven Ridge, Musician Seamounts	26.2229	-159.146	2524	RV Okeanos Explorer	EX1708	2017-09-09	Cantwell K, Putts M, Smith J (2018). Oceanographic data and information collected during the EX1708 Musicians Seamounts (ROV & Mapping) expedition on NOAA Ship OKEANOS EXPLORER in the Pacific Ocean from 2017-09-06 to 2017-09-30 (NCEI Accession 0170178). Imagery. NOAA National Centers for Environmental Information. Dataset. https://doi.org/10.25921/a1my-pd29. Accessed 13-09-2021.
Guide	D2-EX1708-04-22:20:34	Sibelius Seamount, Musician Seamounts	27.2462	-160.632	2526	RV Okeanos Explorer	EX1708	2017-09-10	Cantwell K, Putts M, Smith J (2018). Oceanographic data and information collected during the EX1708 Musicians Seamounts (ROV & Mapping) expedition on NOAA Ship OKEANOS EXPLORER in the Pacific Ocean from 2017-09-06 to 2017-09-30 (NCEI Accession 0170178). Imagery. NOAA National Centers for Environmental Information. Dataset. https://doi.org/10.25921/a1my-pd29. Accessed 13-09-2021.
Guide	D2-EX1708-19-23:33:39	Mendelsohn Seamount	25.1607	-161.648	1653	RV Okeanos Explorer	EX1708	2017-09-25	Cantwell K, Putts M, Smith J (2018). Oceanographic data and information collected during the EX1708 Musicians Seamounts (ROV & Mapping) expedition on NOAA Ship OKEANOS EXPLORER in the Pacific Ocean from 2017-09-06 to 2017-09-30 (NCEI Accession 0170178). Imagery. NOAA National Centers for Environmental Information. Dataset. https://doi.org/10.25921/a1my-pd29. Accessed 13-09-2021.
