# Supplementary material for: Description of a new and widely distributed species of Bathypathes (Cnidaria: Anthozoa: Antipatharia: Schizopathidae) previously misidentified as Bathypathes alternata Brook, 1889
Source: PeerJ. 2022 Feb 8;10:e12638. doi: 10.7717/peerj.12638 (PMC8833236; doi:10.7717/peerj.12638)
Supplement: Supplemental Information 2 — (A) Species list and distribution. Species of uncertain taxonomic position not included in analysis highlighted in red. Potential new species highlighted in blue. Doubtful records in parentheses. Regions sensu Watling et al. (2013). (B) References. [file peerj-10-12638-s002.xlsx]

## Sheet: A.Species list and distribution
Bathymetric and geographical distribution of Antipatharia reported from lower bathyal (801-3500m) and abyssal (3501-6500m) zones. Species of uncertain taxonomic position not included in analysis highlighted in red. Potential new species highlighted in blue. Doubtful records in parentheses. Regions sensu Watling et al. (2013)
Species	depth min	depth max	BY1	BY2	BY3	BY4	BY5	BY6	BY7	BY8	BY9	BY10	BY11	BY12	BY13	BY14	AB2	AB3	AB4	AB5	AB6	AB7	AB8	AB9	AB10	AB11	AB12	AB13	AB14	Reference (for full reference see next Tab)
Antipathidae
Allopathes denhartogi	1100	1300				x																								[35]
Antipathes dichotoma	58	1300				x																								[5]
Antipathes dicrocrada	88	942						x																						[39]
Antipathes furcata	30	2480				x																								[19]
Antipathes leptocrada	175	1443						x																						[38]
Antipathes sylospongia	676	1765														x														[44]
Antipathes viminalis	1385	2165				x																								[19] (including A.virgata sensu Roule, 1905)
Stichopathes abyssicola	240	2037		x		x																								[22]
Stichopathes ceylonensis	20	984											x	x																[54]
Stichopathes flagellum	1165	2000				x																								[19]
Stichopathes gravieri	518	1680				x																								[19], [48]
Stichopathes indica	805	1644											x																	[50]
Stichopathes richardi	540	1968				x																								[19]
Stichopathes n.sp.	2032	2100				x																								[3], [23](as Antipatharia gen. sp.)
Stichopathes spp.	300	7000					x			x				x		x							x							[19] (as Cirripathes sp.),[45] (as Stichopathes gracilis), [46] (as Stichopathes variabilis)
Aphanipathidae
Aphanostichopathes dissimilis	240	1485				x																								[7], [19]
Aphanostichopathes euoplos	1694	1694				x																								[19], [50]
Aphanostichopathes paucispina	1060	1350			x				x						x															[13],[40]
Aphanostichopathes spiessi	440	900			x	x									x															[13],[40]
Elatopathes abietina	34	915				x																								[9] (as Aphanipathes squamosa St 2214)
Phanopathes erinaceus	1250	1250				x																								[19]
Phanopathes sp.	1197	1197				x																								[3]
Aphanipathidae indet.	951	951												x																[54] (as Plumapathes cf pennacea St. 52)
Schizopathidae
Abyssopathes anomala	4770	5130																					x			x				[26]
Abyssopathes lyra	3459	5930				x											x						x		x	x	x	x		[6], [26]
Abyssopathes lyriformis	2542	4892												x		x					x		x			x				[11],[26], [34]
Alternatipathes alternata	2670	5089				x		x					x			x					x		x			x		x		[26]; [45] (partim as Bathypathes patula); [46] (partim as Bathypathes patula);
Alternatipathes bipinnata	2057	2075							x	x																				[1], [37]
Alternatipathes mirabilis	4685	4685																										x		[43]
Alternatipathes venusta	2638	2821							x							x														[44]
Bathypathes alaskensis	272	1180			x																									[43]
Bathypathes bayeri	1154	1154							x																					[33]
Bathypathes bifida	2578	3056				x					x																			[51]; this publication (Supplementary Material S3)
Bathypathes conferta	567	800						x				x																		[6], [17]
Bathypathes erotema	4636	4636																			x									[50]
Bathypathes galathea	2950	3620				x			x																			x		[13],[45],[46]
Bathypathes n.sp. 2	2580	2580				x																								[3]
Bathypathes n.sp.3	2000	2817				x																								[3],[53](as B. patula)
Bathypathes patula	2606	5303				(x)		x						x			(x)				(x)							x		[6], [11]
Bathypathes plenispina	102	1957										x		x																[6], [51]
Bathypathes pseudoalternata	331	4152				x		x				x	x	x		x	x													this publication
Bathypathes ptiloides	4477	4664																										x		[43]
Bathypathes tenuis	4755	4755																					x							[6]
Bathypathes tiburonae	3121	3356			x																									[43]
Bathypathes spp.	755	3465				x		x				x			x															[13] (as B. galathea), [15], [17] (as B.patula), [22]
Dendrobathypathes boutilleri	1060	2162			x																									[7], [37]
Dendrobathypathes fragilis	1073	1073												x																[37]
Dendrobathypathes grandis	417	2204										x			x															[12], [34]
Dendrobathypathes isocrada	659	1110						x				x	x																	[34]
Dendrobathypathes n.sp.	1128	1128				x																								[3]
Dendrobathypathes sp.	1000	1000			x																									[21]
Lillipathes quadribrachiata	1265	1265												x																[54]
Lillipathes ritamariae	1005	1800							x	x	x	x																		[2],[41]
Lillipathes wingi	518	2083			x																									[37]
Parantipathes dodecasticha	883	1108						x																						[38]
Parantipathes euantha	862	2761			x					x																				[27]
Parantipathes helicosticha	895	1131						x				x	x		x															[19], [32]
Parantipathes hirondelle	510	1872				x																								[19]
Parantipathes laricides	837	934												x																[13], [54]
Parantipathes pluma	329	977			x																									[43]
Parantipathes n.sp.	510	1385			x																									[3]
Parantipathes wolffi	1140	1140											x																	[46]
Parantipathes sp.	1040				x																									[46] (as P.euantha)
Parantipathes spp.**	916	920												x	x															[11] (P.cf. euantha), [13] (P. cf. laricides)
Schizopathes affinis	1576	8900				x		x					x	x	x	x												x		[19]; [28],[26], [30], [45] (partim as Bathypathes patula), [46] (partim as Bathypathes patula);
Schizopathes amplispina	1510	1600											x																	[30]
Schizopathes crassa	2836	3475									x	x			x															[6], [30]
Schizopathes indet	3108	3108									x																			[52] (as Bathypathes patula)
Schizopathidae gen.sp.	2743	2743										x																		[52] (as Antipathes plana)
Stauropathes arctica	740	1850		x		x																								[19]
Stauropathes staurocrada	402	1700														x														[34]
Stauropathes stellata	2207	2308						x																						[39]
Stauropathes punctata	1300	1311				x									x															[22], [14]
Stauropathes spp**	1800	2508					x						x	x	x															[15], [18] (as Antipathes sp.)
Taxipathes recta	768	1768		x											x															[6], this publication (Supplementary Material S3)
Telopathes magna	1073	1983				x									(x)															[16]
Telopathes tasmanensis	810	1083						x				x																		[19]
Telopathes sp.	1830	1830				x																								[3]
Umbellapathes helioanthes	1205	1383														x														[37]
Umbellapathes litocrada	1528	2352														x														[44]
Umbellapathes parva	1488	1766												x																[14]
"Stichopathes" robusta (Schizopathidae incertae sedis)	1700	1700		x																										[10], [22] (partim)
Cladopathidae
Chrysopathes formosa	417	950							x																					[36]
Chrysopathes micracantha	746	1130				x									x															[42]
Chrysopathes speciosa	518	1200							x																					[36]
Cladopathes plumosa	558	2049				x		x				x			x															[3], [6], [36]
Heteropathes heterorhodzos	1062	1062											x																	[8]
Heteropathes americana	2200	2507				x							x	x																[11], [36]
Heteropathes intricata	1476	1783						x																						[39]
Heteropathes opreski	1955	2738				x																								[23]
Heteropathes pacifica	3563	4511																										x		[37]
Sibopathes gephura	1074	1224												x																[54]
Sibopathes macrospina	448	940				x																								[3], [29]
Trissopathes grasshoffi	280	1196				x																								[3], [24]
Trissopathes tetracrada	999	2220				x						x	x																	[3], [36]
Trissopathes tristicha	430	2828				x							x		x															[13], [36]
Trissopathes spp.	1200	1300			x										x															[13]
Leiopathidae
Leiopathes acanthophora	1011	1020						x				x	x																	[31]
Leiopathes annosa	295	1020													x															[56]
Leiopathes expansa	900	1113		x		x																								[3]
Leiopathes glaberrima	610	4150				x									(x)		x													[13], [22]
Leiopathes grimaldi	880	2165				x																								[49]
Leiopathes secunda	760	1100						x				x																		[31]
Leiopathes valdiviae	805	805											x																	[20], [47]
Myriopathidae
Antipathella wollastoni	100	1426				x																								[19]
Stylopathidae
Stylopathes stenotes	218	1174						x																						[39]
Triadopathes triadocrada	160	1170						x				x	x		x															[13], [32]
Tylopathes sp.n.	745	918				x																								[3]

## Sheet: B. References
References used to compile distribution records for black corals occuring below 800 m
1. Araya JF, Aliaga JA, and Opresko D. 2017. First record of Alternatipathes bipinnata (Cnidaria: Antipatharia) in the Southern Hemisphere. Zootaxa 4312:189-193.
2. Araya JF, Aliaga JA, and Araya ME. 2018. First record of Lillipathes ritamariae Opresko and Breedy, 2010 (Cnidaria: Antipatharia) from the southeastern Pacific Ocean. Marine Biodiversity 48:1601-1605.
3. Barrett NJ, Hogan RI, Allcock AL, Molodtsova T, Hopkins K, Wheeler AJ, and Yesson C. 2020. Phylogenetics and mitogenome organisation in black corals (Anthozoa: Hexacorallia: Antipatharia): an order-wide survey inferred from complete mitochondrial genomes. Frontiers in Marine Science 7. 10.3389/fmars.2020.00440
4. Bilewitch, J.P., Tracey, D. (2020) Protected coral connectivity in New Zealand. Final Report prepared by NIWA for the Conservation Services Programme, Department of Conservation. DOC19306-POP201806. NIWA Client Report 2020222WN: 32. [available from https://www.doc.govt.nz/globalassets/documents/conservation/marine-and-coastal/marine-conservation-services/reports/final-reports/pop2018-06-protec…
5. Bo M, Bavestrello G, Canese S, Giusti M, Angiolillo M, Cerrano C, Salvati E, and Greco S. 2011. Coral assemblage off the Calabrian Coast (South Italy) with new observations on living colonies of Antipathes dichotoma. Italian Journal of Zoology 78:231-242. 10.1080/11250001003652619
6. Brook G. 1889. Report on the Antipatharia collected by HMS Challenger during the years 1873–1876. Report on the Scientific Results of ther voyage of HMS “Challenger” during the years 1873–76 Zoology. London, Edinburgh, Dublin.
7. Brugler MR, Opresko DM, and France SC. 2013. The evolutionary history of the order Antipatharia (Cnidaria: Anthozoa: Hexacorallia) as inferred from mitochondrial and nuclear DNA: implications for black coral taxonomy and systematics. Zoological Journal of the Linnean Society 169:312-361. 10.1111/zoj.12060
8. Cooper FC. 1909. Antipatharia. Transactions of the Linnean Society Ser.2 12:301-321.
9. Gravier C. 1921. Antipathaires provenant des campagnes des yachts" Princesse-Alice" et" Hirondelle II"(1903-1913). Resultats des Campagnes Scientifiques du Prince de Monaco. Monaco: éditeur non identifié. p 1-29.
10. Gravier C. 1918. Note sur les Antipathaires du Golfe de Naples. Pubblicazioni della Stazione Zoologica di Napoli 2:229-240.
11. Horowitz J, Opresko DM, and Bridge TCL. 2018. Black corals (Anthozoa: Antipatharia) from the deep (916 m-2542 m) Coral Sea, north-eastern Australia. Zootaxa 4472:307-326. 10.11646/zootaxa.4472.2.5
12. Lauretta D, and Penchaszadeh PE. 2017. Gigantic oocytes in the deep sea black coral Dendrobathypathes grandis (Antipatharia) from the Mar del Plata submarine canyon area (southwestern Atlantic). Deep Sea Research Part I: Oceanographic Research Papers 128:109-114.
13. Lima MM, Cordeiro RTS, and Perez CD. 2019. Black Corals (Anthozoa: Antipatharia) from the Southwestern Atlantic. Zootaxa 4692:zootaxa 4692 4691 4691. 10.11646/zootaxa.4692.1.1
14. Lü T, Zhan Z, and Xu K. 2021. Morphology and molecular phylogeny of three black corals (Antipatharia, Schizopathidae) from seamounts in the Western Pacific Ocean, with description of a new species. Journal of Oceanology and Limnology 39:1740-1757.
15. MacIntosh H, Althaus F, Williams A, Tanner JE, Alderslade P, Ahyong ST, Bax N, Criscione F, Crowther AL, Farrelly CA, Finn JK, Goudie L, Gowlett-Holmes K, Hosie AM, Kupriyanova E, Mah C, McCallum AW, Merrin KL, Miskelly A, Mitchell ML, Molodtsova T, Murray A, O’Hara TD, O’Loughlin PM, Paxton H, Reid AL, Sorokin SJ, Staples D, Walker-Smith G, Whitfield E, and Wilson RS. 2018. Invertebrate dive…
16. Macisaac KG, Best M, Brugler MR, Kenchington EL, Anstey LJ, and Jordan T. 2013. Telopathes magna gen. nov., spec. nov. (Cnidaria: Anthozoa: Antipatharia: Schizopathidae) from deep waters off Atlantic Canada and the first molecular phylogeny of the deep-sea family Schizopathidae. Zootaxa 3700:237-258. 10.11646/zootaxa.3700.2.3
17. Marriott P, Tracey DM, Bostock H, Hitt N, and Fallon SJ. 2020. Ageing deep-sea black coral Bathypathes patula. Frontiers in Marine Science 7:479.
18. Molodtsova TN. 2005. A new species of Saropathes (Cnidaria, Anthozoa, Antipatharia) from the Norfolk Ridge (south-west Pacific, New Caledonia). Zoosystema 27:699-707.
19. Molodtsova T. 2006. Black corals (Antipatharia: Anthozoa: Cnidaria) of the north-eastern Atlantic. Biogeography of the Atlantic Seamounts, edited by: Mironov, AN, Gebruk, AV, and Southward, AJ, KMK Scientific Press, Moscow:141-151.
20. Molodtsova TN. 2011. A new species of Leiopathes (Anthozoa: Antipatharia) from the great Meteor seamount (North Atlantic). Zootaxa 3138:52-64.
21. Molodtsova TN. 2013. Order Antipatharia. . In: Sirenko BI, ed. Check-list of species of free-living invertebrates of the Russian Far Eastern. St. Peterburg, 48.
22. Molodtsova TN. 2014. Deep-sea fauna of european seas: an annotated species check-list of benthic invertebrates living deeper than 2000 m in the seas bordering Europe. Ceriantharia. Invertebrate Zoology 11:99-100.
23. Molodtsova TN. 2017. New records of Heteropathes Opresko, 2011 (Anthozoa: Antipatharia) from the Mid-Atlantic Ridge. Marine Biodiversity 47:179-186.
24. Molodtsova TN, Altuna A, and Hall-Spencer JM. 2019. Trissopathes (Anthozoa: Antipatharia) in the north-east Atlantic, with a description of T. grasshoffi sp. nov. Zootaxa 4700:zootaxa 4700 4704 4702. 10.11646/zootaxa.4700.4.2
25. Molodtsova TN, Galkin SV, Kobyliansky SG, Simakova UV, Vedenin AA, Dobretsova IG, and Gebruk AV. 2017. First data on benthic and fish communities from the Mid-Atlantic Ridge, 16°40′− 17°14′N. Deep Sea Research Part II: Topical Studies in Oceanography 137:69-77. 10.1016/j.dsr2.2016.10.006
26. Molodtsova TN, and Opresko DM. 2017. Black corals (Anthozoa: Antipatharia) of the Clarion-Clipperton Fracture Zone. Marine Biodiversity 47:349-365. 10.1007/s12526-017-0659-6
27. Molodtsova TN, and Pasternak FA. 2005. Redescription of Parantipathes euantha (Pasternak, 1958) (Anthozoa: Antipatharia) from Kurile-Kamchatka Trench. Invertebrate Zoology 2:169-179.
28. Molodtsova TN, Sanamyan NP, and Keller NB. 2008. Anthozoa from the northern Mid-Atlantic Ridge and Charlie-Gibbs Fracture Zone. Marine Biology Research 4:112-130. 10.1080/17451000701821744
29. Opresko DM. 1993. A new species of Sibopathes (Cnidaria: Anthozoa: Antipatharia: Antipathidae) from the Gulf of Mexico. Proceedings of the Biological Society of Washington 106:195-203.
30. Opresko DM. 1997. Review of the genus Schizopathes (Cnidaria: Antipatharia: Schizopathidae) with a description of a new species from the Indian Ocean Proceedings of the Biological Society of Washington 110:157-166.
31. Opresko DM. 1998. Three new species of Leiopathes (Cnidaria: Anthozoa: Antipatharia) from southern Australia. Records of the South Australian Museum 31:99-111.
32. Opresko DM. 1999. New species of Antipathes and Parantipathes (Cnidaria: Anthozoa: Antipatharia) from coastal waters of south Australia and Tasmania. Records of the Australian Museum 32:143-154.
33. Opresko DM. 2001. New species of antipatharian coral, Bathypathes bayeri (Cnidaria: Anthozoa: Antipatharia), from the Galapagos Islands. Bulletin of the Biological Society of Washington 10:204-209.
34. Opresko DM. 2002. Revision of the Antipatharia (Cnidaria: Anthozoa). Part II. Schizopathidae. Zoologische Mededelingen, Leiden 76.
35. Opresko DM. 2003a. A new species of Allopathes (Cnidaria: Antipatharia) from the eastern. Zoologische verhandelingen 345:275-280.
36. Opresko DM. 2003b. Revision of the Antipatharia.(Cnidaria: Anthozoa). Part III. Cladopathidae. Zoologische Mededelingen, Leiden 77.
37. Opresko DM. 2005. New genera and species of antipatharian corals (Cnidaria: Anthozoa) from the North Pacific. Zoologische Mededelingen, Leiden 79-2:129-165.
38. Opresko DM. 2015. New species of black corals (Cnidaria: Anthozoa: Antipatharia) from New Zealand and adjacent regions. New Zealand Journal of Zoology 42:145-164. 10.1080/03014223.2015.1051550
39. Opresko DM. 2019. New species of black corals (Cnidaria: Anthozoa: Antipatharia) from the New Zealand region, part 2. New Zealand Journal of Zoology:1-38. 10.1080/03014223.2019.1650783
40. Opresko DM, Bo M, Stein DP, Evankow A, Distel DL, and Brugler MR. 2021. Description of two new genera and two new species of antipatharian corals in the family Aphanipathidae (Cnidaria: Anthozoa: Antipatharia). Zootaxa 4966:161-174. 10.11646/zootaxa.4966.2.4
41. Opresko DM, and Breedy O. 2010. A new species of antipatharian coral (Cnidaria: Anthozoa: Antipatharia: Schizopathidae) from the Pacific coast of Costa Rica. Proceedings of the Biological Society of Washington 123:234–241.
42. Opresko DM, and Loyola LL. 2008. Two new species of Chrysopathes (Cnidaria: Anthozoa: Antipatharia) from the Western Atlantic. Zootaxa 1707:49–59.
43. Opresko DM, and Molodtsova TN. 2021. New species of deep-sea antipatharians from the North Pacific (Cnidaria: Anthozoa: Antipatharia), Part 2. Zootaxa 4999(5), 401-422. 10.11646/zootaxa.4999.5.1
44. Opresko DM, and Wagner D. 2020. New species of black corals (Cnidaria: Anthozoa: Antipatharia) from deep-sea seamounts and ridges in the North Pacific. Zootaxa 4868:543-559. 10.11646/zootaxa.4868.4.5
45. Pasternak F. 1976. New data on the composition and distribution of the deepsea Antipatharians (Hexacorallia, Antipatharia) in the Pacific, Indian and Atlantic oceans. Trudy Instituta Okeanologii Akademii Nauk SSSR 99:45-58.
46. Pasternak FA. 1977. Antipatharia. Galathea Report Scientific Reports of the Danish Deep-Sea Expedition round the World 1950-1952. p 167-164.
47. Pax F. 1922. Die Antipatharien (Nachtrag) der Deutschen Tiefsee-Expedition. Wissenschaftliche Ergebnisse der Deutschen Tiefsee-Expedition auf dem Dampfer" Valdivia" 1898-1899. p 3-5.
48. Roberts JM, Henry LA, Long D, and Hartley JP. 2008. Cold-water coral reef frameworks, megafaunal communities and evidence for coral carbonate mounds on the Hatton Bank, north east Atlantic. Facies 54:297-316. 10.1007/s10347-008-0140-x
49. Roule L. 1905. Description des Antipathaires et Cérianthaires recueillis par SAS le Prince de Monaco dans l'Atlantique nord, 1886-1902. Résultats des Campagnes Scientifiques du Prince de Monaco. Monaco.
50. Schultze LS. 1902. Die Antipatharien der deutschen Tiefsee-Expedition 1898-1899. In: Chun K, editor. Wissenschaftliche Ergebnisse der Deutschen Tiefsee-Expedition auf dem Dampfer" Valdivia" 1898-1899. p 87-100.
51. Thomson J. 1905. "Scotia" Collection: Scottish Antarctic Expedition.- Report on the Antipatharians. Proceedings of the Royal Society of Edinburgh 16:70-79.
52. Thomson JA, and Rennet NI. 1931. Alcyonaria, Madreporaria, and Antipatharia. Australasian Antarctic Expedition 1911-14 Under the leadership of Sir D Mawson Scientific Reports C Zoology and Botany. Sydney. p 1-46.
53. Tyler P, and Zibrowius H. 1992. Submersible observations of the invertebrate fauna on the continental-slope southwest of Ireland (NE Atlantic Ocean). Oceanologica Acta 15:211-226.
54. van Pesch AJ. 1914. The Antipatharia of the Siboga Expedetion. Siboga-Expeditie. Leyden. p 1-258.
55. Watling L, Guinotte J, Clark MR, and Smith CR. (2013). A proposed biogeography of the deep ocean floor. Progress in Oceanography 111:91–112.
56. Wagner, D. & Opresko, DM. 2015. Description of a new species of Leiopathes (Antipatharia: Leiopathidae) from the Hawaiian Islands. Zootaxa, 3974, 277-289
