# Supplementary material for: Description of a new and widely distributed species of Bathypathes (Cnidaria: Anthozoa: Antipatharia: Schizopathidae) previously misidentified as Bathypathes alternata Brook, 1889
Source: PeerJ. 2022 Feb 8;10:e12638. doi: 10.7717/peerj.12638 (PMC8833236; doi:10.7717/peerj.12638)
Supplement: Supplemental Information 3 — Catalog numbers and locations of unpublished records used in Supplementary Material S2 [file peerj-10-12638-s003.xlsx]

## Sheet: ADDITIONAL DISTRIBUTION RECORDS
Additional species distribution records based on specimens identified/checked by T.N. Molodtsova, D.M. Opresko
species	family	catalog number	depth	latitude	longitude	region	identified by	gbif link
Bathypathes bifida	Schizopathidae	NIWA 38029	3203-3210	-68.5645	-178.329	BY9	D. Opresko	https://www.gbif.org/occurrence/2424071420
Bathypathes bifida	Schizopathidae	NIWA 38462	3475-3485	-67.6243	-178.886	BY9	D. Opresko	https://www.gbif.org/occurrence/2424074035
Bathypathes bifida	Schizopathidae	USNM 100082	2886-3040	-55.092	-39.842	BY9	D. Opresko	https://www.gbif.org/occurrence/1318524870
Bathypathes bifida	Schizopathidae	MNHN IK-2012-12173	3000-3056	38.9667	38.9667	BY4	T. Molodtsova	https://www.gbif.org/occurrence/1265870916
Taxipathes recta	Schizopathidae	USNM 86892	1235-1768	10.05	-76.45	BY4	D. Opresko	https://www.gbif.org/occurrence/2556901162
