# Supplementary material for: Description of a new and widely distributed species of Bathypathes (Cnidaria: Anthozoa: Antipatharia: Schizopathidae) previously misidentified as Bathypathes alternata Brook, 1889
Source: PeerJ. 2022 Feb 8;10:e12638. doi: 10.7717/peerj.12638 (PMC8833236; doi:10.7717/peerj.12638)
Supplement: Supplemental Information 4 — links to underwater images and video showing distinctive gross morphology and associated fauna [file peerj-10-12638-s004.xlsx]

## Sheet: underwater imagery
Comparison of underwater imagery of Bathypathes pseudoalternata n. sp. and Alternatipathes spp.
	Photograph (NOAA Animal Guide or NOAA Deep-Sea Coral and Sponge portal link)	Seatube V3 link	Collected (YES/NO)	Specimen collected	identification	Associated fauna		notes
Bathypathes pseudoalternata
PACIFIC OCEAN	https://www.ncei.noaa.gov/waf/okeanos-animal-guide/Schizopathidae031.html	https://data.oceannetworks.ca/SeaTubeV3?resourceTypeId=600&resourceId=4760&time=2015-08-31T23:25:38.000Z	NO	NA	from video	NOT VISIBLE
PACIFIC OCEAN	https://www.ncei.noaa.gov/waf/okeanos-animal-guide/Schizopathidae032.html	https://data.oceannetworks.ca/SeaTubeV3?resourceTypeId=600&resourceId=3400&time=2016-07-02T00:13:44.000Z	NO	NA	from video	NOT VISIBLE
PACIFIC OCEAN	https://www.ncei.noaa.gov/waf/okeanos-animal-guide/Schizopathidae037.html	https://data.oceannetworks.ca/SeaTubeV3?resourceTypeId=600&resourceId=664&time=2017-03-25T22:51:25.000Z	NO	NA	from video	NO
PACIFIC OCEAN	https://www.ncei.noaa.gov/waf/okeanos-animal-guide/Schizopathidae038.html	https://data.oceannetworks.ca/SeaTubeV3?resourceTypeId=600&resourceId=543&time=2017-05-10T20:58:11.000Z	NO	NA	from video	Polychaete
PACIFIC OCEAN	https://www.ncei.noaa.gov/waf/okeanos-animal-guide/Schizopathidae041.html	https://data.oceannetworks.ca/SeaTubeV3?resourceTypeId=600&resourceId=573&time=2017-05-13T20:55:07.000Z	NO	NA	from video	Polychaete
PACIFIC OCEAN	https://www.ncei.noaa.gov/waf/okeanos-animal-guide/Schizopathidae042.html	https://data.oceannetworks.ca/SeaTubeV3?resourceTypeId=600&resourceId=593&time=2017-07-13T23:53:15.000Z	NO	NA	from video	NOT VISIBLE
PACIFIC OCEAN	https://www.ncei.noaa.gov/waf/okeanos-animal-guide/Schizopathidae045.html	https://data.oceannetworks.ca/SeaTubeV3?resourceTypeId=600&resourceId=623&time=2017-07-17T20:40:49.000Z	NO	NA	from video	Polychaete
PACIFIC OCEAN	https://www.ncei.noaa.gov/waf/okeanos-animal-guide/Schizopathidae049.html	https://data.oceannetworks.ca/SeaTubeV3?resourceTypeId=600&resourceId=693&time=2017-07-26T22:48:57.000Z	NO	NA	from video	NOT VISIBLE
PACIFIC OCEAN	https://www.ncei.noaa.gov/waf/okeanos-animal-guide/Schizopathidae050.html	https://data.oceannetworks.ca/SeaTubeV3?resourceTypeId=600&resourceId=723&time=2017-07-29T21:01:40.000Z	NO	NA	from video	Polychaete
PACIFIC OCEAN	https://www.ncei.noaa.gov/waf/okeanos-animal-guide/Schizopathidae051.html	https://data.oceannetworks.ca/SeaTubeV3?resourceTypeId=600&resourceId=743&time=2017-09-09T20:21:39.000Z	NO	NA	from video	NOT VISIBLE
PACIFIC OCEAN	https://www.ncei.noaa.gov/waf/okeanos-animal-guide/Schizopathidae052.html	https://data.oceannetworks.ca/SeaTubeV3?resourceTypeId=600&resourceId=1470&time=2017-09-10T22:18:27.000Z	NO	NA	from video	NOT VISIBLE		one subpinnule
PACIFIC OCEAN	https://www.ncei.noaa.gov/waf/okeanos-animal-guide/Schizopathidae056.html	https://data.oceannetworks.ca/SeaTubeV3?resourceTypeId=600&resourceId=933&time=2017-09-25T23:33:15.000Z	NO	NA	from video	Polychaete
PACIFIC OCEAN	https://www.ncei.noaa.gov/waf/okeanos-animal-guide/Chirostyloidea012.html	https://data.oceannetworks.ca/SeaTubeV3?resourceTypeId=600&resourceId=554&time=2017-03-14T23:25:28.000Z	NO	NA	from video	Chirostylidae, Uroptychus n.sp.
ATLANTIC OCEAN	https://deepseacoraldata.noaa.gov/db-images/949094.JPG	https://data.oceannetworks.ca/SeaTubeV3?resourceTypeId=600&resourceId=983&time=2017-11-30T20:58:49.000Z	NO	NA	from video	NOT VISIBLE
ATLANTIC OCEAN	https://deepseacoraldata.noaa.gov/db-images/968733.JPG	https://data.oceannetworks.ca/SeaTubeV3?resourceTypeId=600&resourceId=1263&time=2018-06-19T18:58:43.000Z	NO	NA	from video	NOT VISIBLE
ATLANTIC OCEAN	https://deepseacoraldata.noaa.gov/db-images/969362.JPG	https://data.oceannetworks.ca/SeaTubeV3?resourceTypeId=600&resourceId=1293&time=2018-06-22T14:34:33.000Z	NO	NA	from video	NOT VISIBLE
ATLANTIC OCEAN	https://deepseacoraldata.noaa.gov/db-images/967918.JPG	https://data.oceannetworks.ca/SeaTubeV3?resourceTypeId=600&resourceId=1243&time=2018-06-17T13:48:01.000Z	YES	USNM 1490547	confirmed	NOT VISIBLE
ATLANTIC OCEAN	https://deepseacoraldata.noaa.gov/db-images/1069800.jpg	https://data.oceannetworks.ca/SeaTubeV3?resourceTypeId=600&resourceId=2093&time=2019-11-02T15:41:31.000Z	YES	USNM 1607538	confirmed	NOT VISIBLE
Alternatipathes cf. alternata
PACIFIC OCEAN	https://www.ncei.noaa.gov/waf/okeanos-animal-guide/Schizopathidae005.html	https://data.oceannetworks.ca/SeaTubeV3?resourceTypeId=600&resourceId=2980&time=2016-03-02T21:40:24.000Z	NO	NA	from video	NO
PACIFIC OCEAN	https://www.ncei.noaa.gov/waf/okeanos-animal-guide/Schizopathidae006.html	https://data.oceannetworks.ca/SeaTubeV3?resourceTypeId=600&resourceId=3430&time=2016-07-04T02:20:28.000Z	NO	NA	from video	NO
PACIFIC OCEAN	https://www.ncei.noaa.gov/waf/okeanos-animal-guide/Schizopathidae007.html	https://data.oceannetworks.ca/SeaTubeV3?resourceTypeId=600&resourceId=3390&time=2016-07-01T00:24:18.000Z	NO	NA	from video	NO
Alternatipathes sp.
ATLANTIC OCEAN	https://deepseacoraldata.noaa.gov/db-images/949389.JPG	https://data.oceannetworks.ca/SeaTubeV3?resourceTypeId=600&resourceId=1003&time=2017-12-02T17:21:00.000Z	NO	NA	from video	Mysidacea
ATLANTIC OCEAN	https://deepseacoraldata.noaa.gov/db-images/968115.JPG	https://data.oceannetworks.ca/SeaTubeV3?resourceTypeId=600&resourceId=1243&time=2018-06-17T16:54:29.000Z	NO	NA	from video	NO
